# Supplementary material for: Gait improvement via rhythmic stimulation in Parkinson’s disease is linked to rhythmic skills
Source: PubMed Central journal article supplement (PMC5324039; doi:10.1038/srep42005), 2017-02-24
Supplement: srep42005-s1.pdf [file srep42005-s1.pdf]

## **SUPPLEMENTARY INFORMATION**

Gait improvement via rhythmic stimulation in Parkinson's disease is linked to rhythmic skills

*Simone Dalla Bella, Charles-Etienne Benoit, Nicolas Farrugia, Peter Keller, Hellmuth Obrig, Stefan Mainka & Sonja A. Kotz*

**Supplementary Table 1:** Performance in paced tapping and adaptive tapping tasks for IPD patients obtained pre-, post-training and at the follow-up, and for matched controls.

|                              | Controls   | Patients   |             |            | Comparisons (significance) |             |                  |
|------------------------------|------------|------------|-------------|------------|----------------------------|-------------|------------------|
|                              |            | Pre        | Post        | Follow-up  | Pre vs Control             | Post vs Pre | Follow-up vs Pre |
|                              | Mean (SEM) | Mean (SEM) | Mean (SEM)  | Mean (SEM) | P                          | P           | P                |
| <b>Paced tapping</b>         |            |            |             |            |                            |             |                  |
| <b>450 ms</b>                |            |            |             |            |                            |             |                  |
| Inter-step interval (ms)     | 450.3 (.3) | 449.8 (.2) | 449.8 (.2)  | 450.0 (.2) | p = .22                    | p = .36     | p = .26          |
| Sync. accuracy (% of IOI)    | 4.9 (.6)   | 6.8 (1.3)  | 5.4 (.5)    | 7.0 (1.1)  | p = .11                    | p = .29     | p = .43          |
| Sync. variability (% of IOI) | .59 (.09)  | .54 (.04)  | .55 (.04)   | .52 (.05)  | p = .37                    | p = .48     | p = .21          |
| <b>600 ms</b>                |            |            |             |            |                            |             |                  |
| Inter-step interval (ms)     | 599.7 (.2) | 599.8 (.2) | 603.7 (3.6) | 599.8 (.1) | p = .38                    | p = .10     | p = .35          |
| Sync. accuracy (% of IOI)    | 6.8 (1.1)  | 6.3 (.8)   | 6.8 (1.2)   | 5.8 (1.1)  | p = .28                    | p = .50     | p = .33          |
| Sync. variability (% of IOI) | .52 (.04)  | .52 (.02)  | .60 (.1)    | .47 (.03)  | p = .11                    | p = .33     | p < .05          |
| <b>750 ms</b>                |            |            |             |            |                            |             |                  |
| Inter-step interval (ms)     | 749.8 (.2) | 750.1 (.5) | 749.8 (.3)  | 749.7 (.3) | p = .30                    | p = .38     | p = .18          |
| Sync. accuracy (% of IOI)    | 3.9 (.5)   | 5.4 (.9)   | 5.7 (1.4)   | 4.3 (.8)   | p = .09                    | p = .20     | p < .05          |
| Sync. variability (% of IOI) | .47 (.03)  | .55 (.04)  | .76 (.3)    | .54 (.06)  | p = .08                    | p = .25     | p = .29          |
| <b>Adaptive tapping</b>      |            |            |             |            |                            |             |                  |
| <b>Deceleration</b>          |            |            |             |            |                            |             |                  |
| Adaptation index             | 1.3 (.1)   | 1.2 (.2)   | 1.2 (.1)    | 1.3 (.2)   | p = .27                    | p = .40     | p = .31          |
| Phase                        | .51 (.07)  | .71 (.1)   | .53 (.1)    | .59 (.1)   | p = .20                    | p = .09     | p = .18          |
| Period                       | .92 (.1)   | .78 (.1)   | .99 (.1)    | 1.1 (.1)   | p = .16                    | p = .34     | p = .05          |
| <b>Acceleration</b>          |            |            |             |            |                            |             |                  |
| Adaptation index             | 1.5 (.1)   | 1.6 (.08)  | 1.4 (.1)    | 1.5 (.1)   | p = .29                    | p = .07     | p = .23          |
| Phase                        | .50 (.07)  | .58 (.07)  | .59 (.07)   | .50 (.09)  | p = .22                    | p = .36     | p = .28          |
| Period                       | 1.2 (.1)   | .96 (.09)  | .85 (.09)   | 1.1 (.1)   | p = .19                    | p = .22     | p = .27          |
